# Supplementary material for: Patient-Reported Goals of Youths in Canada Receiving Medication-Assisted Treatment for Opioid Use Disorder
Source: PubMed Central journal article supplement (PMC8343465; doi:10.1001/jamanetworkopen.2021.19600), 2021-08-05
Supplement: jamanetwopen-e2119600-s001.pdf [file jamanetwopen-e2119600-s001.pdf]

## Supplementary Online Content

Chai D, Rosic T, Panesar B, et al. Patient-reported goals of youths in Canada receiving medication-assisted treatment for opioid use disorder. *JAMA Netw Open*. 2021;4(8):e2119600. doi:10.1001/jamanetworkopen.2021.19600

**eTable 1.** Summary of Themes Derived From Qualitative Analysis (n = 152)

**eTable 2.** Demographic and Clinical Characteristics (n = 152)

This supplementary material has been provided by the authors to give readers additional information about their work.

**eTable 1.** Summary of Themes Derived From Qualitative Analysis (n = 152)

| <b>Themes</b>                          | <b>Node</b>               | <b>Description</b>                                                                                                                                                                                          |
|----------------------------------------|---------------------------|-------------------------------------------------------------------------------------------------------------------------------------------------------------------------------------------------------------|
| “Taper dose or stop MAT <sup>a</sup> ” | Stop treatment            | Comments relating to getting off MAT <sup>a</sup> treatment, whether suboxone or methadone, regardless of the urgency or timeframe stated.                                                                  |
|                                        | Reduce dose               | Comments relating to coming off MAT <sup>a</sup> slowly, regardless of whether they mention stopping treatment or not; comments coded here focus on reducing dose and do not use taper.                     |
|                                        | Taper dose                | Comments relating to coming off MAT <sup>a</sup> slowly, regardless of whether they mention stopping treatment or not.                                                                                      |
| “Avoid recreational substances”        | Sobriety                  | Comments relating to getting clean, staying clean, achieving abstinence, maintaining abstinence and stopping drug related dependency (on any drug).                                                         |
|                                        | Limit negative influences | Comments relating to staying away from drug inducing people and achieving a drug free environment.                                                                                                          |
| “Manage OUD <sup>b</sup> symptoms”     | Control cravings          | Comments relating to the prevention of cravings, whether to MAT <sup>a</sup> programs or illicit drugs.                                                                                                     |
|                                        | Avoid withdrawal          | Comments relating to the prevention of side effects from drugs, including MAT <sup>a</sup> programs.                                                                                                        |
| “Live a normal life”                   | Establish a stable life   | Comments relating to living a life that is more stable than what they are living currently and living a life that has less stressors; Establishment of a healthier lifestyle than what they currently have. |
| “Improve mental health”                | Manage mental health      | Comments relating to mental illness or the establishment of mental wellbeing by outlining general or specific symptoms such as maladaptive moods and lack of motivation.                                    |
|                                        | Management of stressors   | Comments relating to the seeking of mental health treatment either through the clinic or outside of the clinic to manage stressors in a healthy manner.                                                     |

|                                               |                                               |                                                                                                                                                 |
|-----------------------------------------------|-----------------------------------------------|-------------------------------------------------------------------------------------------------------------------------------------------------|
| Employment                                    | Establishment of personal financial stability | Comments relating to a change of career, getting a job, fulfilment of financial needs.                                                          |
| “Maintain or stabilize MAT <sup>a</sup> dose” | Stabilize dose                                | Comments relating to the stabilization of the current dose, optimization of dose, or maintenance of dose, due to benefits of MAT <sup>a</sup> . |
| Family-related goals                          | Establishment of familial stability           | Comments relating to the fulfilment of financial, practical, and emotional needs of family members.                                             |
|                                               | Regaining family members                      | Comments related to the re-establishment of familial connection (physical or emotional).                                                        |
| Education                                     | Restarting education                          | Comments relating to apprenticeship, trades and the notion of going back to school.                                                             |
| Pain management                               | Pain                                          | Comments relating to the use of MAT <sup>a</sup> to manage pain/chronic pain and general comments on pain management as a goal.                 |
| No goal                                       | No change in treatment                        | Comments relating to having no goals or being uncertain of goals they may have.                                                                 |

<sup>a</sup> Medication-assisted treatment

<sup>b</sup> Opioid use disorder

**eTable 2.** Demographic and Clinical Characteristics (n = 152)

| Characteristic                                           | Participants with complete data (n = 145) | Participants missing 3-month UDS <sup>a</sup> data (n = 7) | p-value |
|----------------------------------------------------------|-------------------------------------------|------------------------------------------------------------|---------|
| Age, years; mean (SD) [range]                            | 22.8 (1.8) [16.7 - 24.9]                  | 22 (2.2) [18 -23.7]                                        | .26     |
| Sex, number of females; n (%)                            | 66 (45.5%)                                | 4 (57.1%)                                                  | .36     |
| <b>Socioeconomic Factors</b>                             |                                           |                                                            |         |
| Patients with children; n (%)                            | 51 (35.2%)                                | 5 (71.4%)                                                  | .05     |
| Currently employed; n (%)                                | 8 (5.5%)                                  | 0 (0%)                                                     | .52     |
| <b>Level of Education</b>                                |                                           |                                                            |         |
| Less than high school; n (%)                             | 63 (43.5%)                                | 7 (100%)                                                   | *.003   |
| High school completed; n (%)                             | 73 (50.3%)                                | 0 (0%)                                                     | *.009   |
| Post-secondary education in progress or completed; n (%) | 9 (6.2%)                                  | 0 (0%)                                                     | .50     |
| <b>MAT<sup>b</sup> History</b>                           |                                           |                                                            |         |
| Type of MAT <sup>b</sup> ; n (%)                         |                                           |                                                            |         |
| Methadone                                                | 102 (70.3%)                               | 4 (57.1%)                                                  | .46     |
| Buprenorphine                                            | 43 (29.7%)                                | 3 (42.9%)                                                  | .46     |
| Baseline dose in mg/day; mean (SD)                       |                                           |                                                            |         |
| Methadone                                                | 60.0 (33.2)                               | 4 (10.9)                                                   | <.001   |
| Buprenorphine                                            | 11.0 (6.8)                                | 3 (6.4)                                                    | .009    |
| Length of treatment in years; median (IQR)               | 0.92 (1.75)                               | 0.17 (0.39)                                                | .09     |
| <b>Substance Use History<sup>c</sup></b>                 |                                           |                                                            |         |
| Number of participants who were opioid abstinent; n (%)  |                                           |                                                            |         |
| Baseline                                                 | 49 (33.8%)                                | 3 (42.9%)                                                  | .62     |
| 3 months                                                 | 78 (53.8%)                                | -                                                          |         |
| Any recreational substance use; n (%)                    |                                           |                                                            |         |
| Baseline                                                 | 121 (83.5%)                               | 5 (71.4%)                                                  | .41     |
| 3 months                                                 | 102 (70.3%)                               | -                                                          |         |
| Cocaine non-user <sup>d</sup> ; n (%)                    |                                           |                                                            |         |
| Baseline                                                 | 58 (40%)                                  | 4 (57.1%)                                                  | .37     |
| 3 months                                                 | 76 (52.4%)                                | -                                                          |         |
| Amphetamine non-user <sup>d</sup> ; n (%)                |                                           |                                                            |         |
| Baseline                                                 | 88 (60.7%)                                | 6 (85.7%)                                                  | .18     |
| 3 months                                                 | 102 (70.3%)                               | -                                                          |         |

|                                               |             |           |     |
|-----------------------------------------------|-------------|-----------|-----|
| Methamphetamine non-user <sup>d</sup> ; n (%) |             |           |     |
| Baseline                                      | 106 (73.1%) | 6 (85.7%) | .46 |
| 3 months                                      | 115 (79.3%) | -         |     |

SD = Standard deviation, IQR = Interquartile range

<sup>a</sup> Urine drug screen

<sup>b</sup> Medication-assisted treatment

<sup>c</sup> Abstinence determined by urine drug screen

<sup>d</sup> Based on urine drug screens during respective period of interest
